# Supplementary material
Source: publisher figshare collection journal article supplement (https://acs.figshare.com/ndownloader/files/3583113)
Supplement: Supplementary file 1 [file 3583113]

## Supplementary material

### 1. Direct comparison of molecular lattice orientation and HOPG <110> axis.

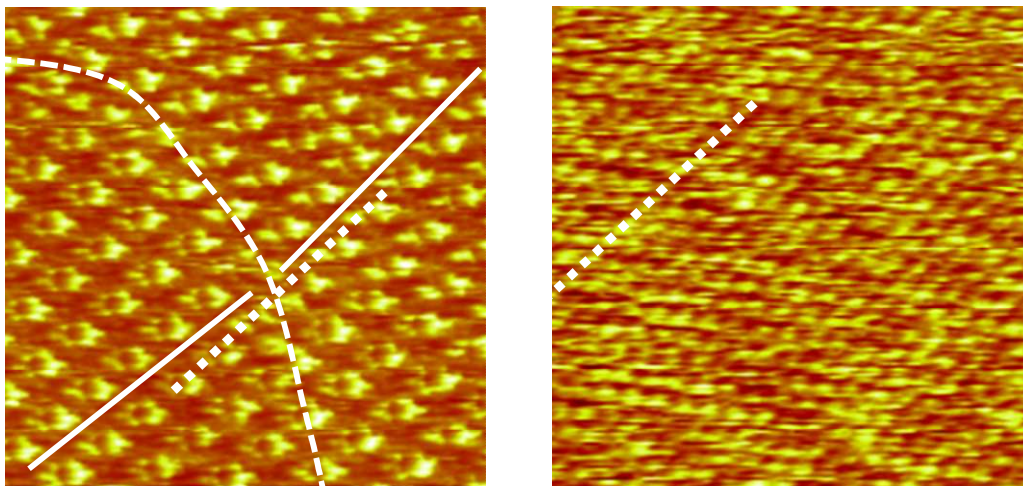

Comparison of a Scanning Tunneling Microscopy images taken on the same area of a self-assembled nanoporous network obtained with TSB3,5-C10. Left: with imaging parameters adapted to molecular imaging (Setpoint: 12pA, sample bias: -0.9V). Right: with imaging parameters adapted to atomic resolution on the HOPG substrate (Setpoint: 900pA, sample bias: -0.28V). Both images were acquired within a 30 second time interval, in the current- (*i.e.* constant-height) mode at fast frame rate (4.8s per frame) in order to reduce the drift. Both images are corrected by home-made software for the drift of the instrument, which was evaluated by correlating successively-acquired images with opposite slow-scan direction. The <100> direction of the substrate is highlighted with a dotted line (right image) and reproduced on the molecular network (left image). The lattice directions of the mirror-symmetric domains (solid lines) form angles of +5° and -2° with the separately measured <100> direction of HOPG, in good agreement with the values expected from the model ( $\pm 3.2^\circ$ ), within experimental errors inherent to this two-step measurement.

## 2. Derivation of the lattice epitaxial registry formula

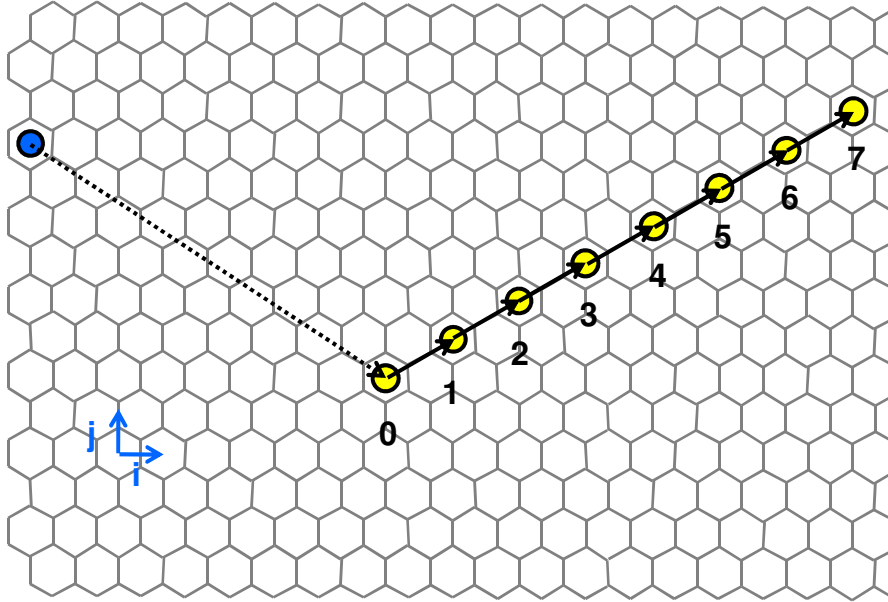

A simplified view of fig. 3.b is represented above. The molecular lattice vectors  $\mathbf{p}_n$  are represented (from the origin point in blue to the corresponding point in yellow) for each number  $n$  of methylene pairs in the alkyl chain (from the extrapolated value  $n = 0$  up to  $n = 7$  which corresponds to *TSB3,5-C14*). It appears that this vector is the sum of a vector  $\mathbf{u}$  (dotted arrow) and  $n$  times a vector  $\mathbf{v}$  (solid arrow). The orthonormal basis we consider in the following is represented in blue in the lower left corner. The unit vectors have the size of HOPG unit vector. Vector  $\mathbf{i}$  is oriented along the  $\langle 100 \rangle$  direction. In this basis, we have:

$$\mathbf{u} = 8\mathbf{i} - 9/\sqrt{3}\mathbf{j}$$

$$\mathbf{v} = 3/2\mathbf{i} + 3/2\sqrt{3}\mathbf{j}$$

$$\text{then } \mathbf{p}_n = \mathbf{u} + n\mathbf{v} = \left(\frac{16+3n}{2}\right)\mathbf{i} + \left(\frac{-18+3n}{2\sqrt{3}}\right)\mathbf{j}$$

$$\text{and } |\mathbf{p}_n| = \sqrt{\left(\frac{16+3n}{2}\right)^2 + \left(\frac{-18+3n}{2\sqrt{3}}\right)^2}$$

and finally:

$$|\mathbf{p}_n| = \sqrt{91 + 15n + 3n^2}$$

The angle  $\theta$  made with the vector  $\mathbf{i}$  is such that

$$\tan \theta = \pm \frac{\left(\frac{-18+3n}{2\sqrt{3}}\right)}{\left(\frac{16+3n}{2}\right)}$$

and finally:

$$\tan \theta = \pm \sqrt{3} \frac{n-6}{3n+16}$$
